# Supplementary material for: Triisopropylsilylethynyl-substituted solid additives for morphology optimization affording high-efficiency organic solar cells
Source: Royal Society of Chemistry journal article supplement (doi:10.1039/d5ta08398b), 2025-12-24
Supplement: d5ta08398b1.pdf [file d5ta08398b1.pdf]

## Supporting Information

### **Triisopropylsilylethynyl-Substituted Solid Additives for Morphology Optimization Enabling High-Efficiency Organic Solar Cells**

Siyuan Zang<sup>a,#</sup>, Jia Wang<sup>b,#</sup>, Shuaiqi Wang<sup>a</sup>, Wenying Zhou<sup>b</sup>, Hongxiang Li<sup>c,d\*</sup>, Bin Kan<sup>b</sup>, Qian Zhang<sup>a,\*</sup>

a. Key Laboratory of Organosilicon Chemistry and Material Technology, Ministry of Education, Zhejiang Key Laboratory of Organosilicon Material Technology, College of Material, Chemistry and Chemical Engineering, Hangzhou Normal University, Hangzhou 311121, China. E-mail: [qzhang@hznu.edu.cn](mailto:qzhang@hznu.edu.cn).

b. School of Materials Science and Engineering, National Institute for Adv. Mater., Nankai University, Tianjin 300350, China.

c. College of Materials and Energy, Guang'an Institute of Technology, Guang'an 638000, China. Email: [lihongxiang@scu.edu.cn](mailto:lihongxiang@scu.edu.cn).

d. College of Polymer Science and Engineering, National Key Laboratory of Advanced Polymer Materials, Sichuan University, Chengdu 610065, China.

<sup>#</sup>Zang S and Wang J contributed equally to this work.

## 1. Materials

Polymer donor PM6 and small molecular acceptor L8-BO were purchased from Hyper Inc., and 2PACz was purchased from TCI Chemical Co. All the other reagents and chemicals were purchased from commercial suppliers and were used directly without further purification unless otherwise noted.

## 2. Measurements and Instruments

$^1\text{H}$ -NMR and  $^{13}\text{C}$ -NMR spectra were recorded on a Bruker AVANCE 500 spectrometer.  $^1\text{H}$  NMR and  $^{13}\text{C}$  NMR spectra were referenced to tetramethylsilane (0 ppm) for  $\text{CDCl}_3$ .

**Thermal gravimetric analyses (TGA).** TGA measurements were performed on TA Q500 instrument under nitrogen gas flow with a  $10\text{ }^\circ\text{C min}^{-1}$  heating rate from room temperature to  $300\text{ }^\circ\text{C}$ . **Differential scanning calorimetry (DSC).** DSC measurements were performed on a TG209 DSC204 DMA242 METTLER3+ DSC instrument with a heating rate of  $10\text{ }^\circ\text{C min}^{-1}$  under a nitrogen atmosphere, with a temperature range from room temperature to  $120\text{ }^\circ\text{C}$ .

**Molecular dynamic (MD) method.** All molecular dynamics simulations were conducted utilizing the GROMACS (2023.3) software package<sup>1</sup>, employing the GROMOS force field. The restrained electrostatic potential (RESP) fitting technique was applied to derive partial charges for each molecule. For D18/L8-BO with Ph-BTBT-10 blend film, 44 D18 molecules with 3 repeat units and 216 L8-BO molecules were randomly put in the box of  $30 \times 30 \times 30\text{ nm}^3$ , and then 65 Ph-BTBT-10 were inserted. All these ratios are consistent with the experimental ratios. All these BHJs films were annealed from 500 K down to 450 K gradually, during 100 ns. The production run lasted 100 ns after an equilibration run of 50 ns. The box sizes, densities and energy analysis were analyzed from the production run. The LINCS algorithm<sup>2</sup> was utilized to constrain covalent bonds involving hydrogen atoms. A simulation time step of 1.0 femtoseconds was employed. Both the pressure and temperature were regulated using the Parrinello–Rahman barostat at 1 atm and the Nose–Hoover thermostat<sup>3, 4</sup>, respectively. The graphics were processed by the Visual Molecular Dynamics (VMD)

program<sup>5</sup>.

**Density Functional Theory (DFT) Calculations.** All alkyl chains were replaced with methyl groups (-CH<sub>3</sub>) to reduce the computational requirements. The ground-state geometry structures were optimized by density functional theory (DFT) under the Becke three-parameter Lee-Yang-Parr (B3LYP) functional combining with 631G(d) the vibrational frequencies were calculated after geometries optimization and no imaginary frequency was found. All the DFT calculations were performed in the Gaussian 16 package.

**UV-visible (UV-vis) absorption.** UV-vis absorption spectra and variable-temperature UV-vis absorption spectra were recorded on a Cary 5000 UV-vis spectrophotometer.

**Atomic force microscopy (AFM).** The AFM images were obtained from a Bruker Dimension Icon atomic force microscope by using in tapping mode. The film samples were prepared under the same conditions as those used for device fabrication.

**Transient photocurrent/photovoltage (TPC/TPV).** The TPC/TPV were performed on a Molex 180081-4320 with a light intensity of about 0.5 sun. Current dynamics was recorded on a digital oscilloscope (Tektronix MDO4104C), and currents under short circuit conditions was measured over a 50  $\Omega$  resistor. The optimized devices were used for TPC measurements directly.

**Measurement of charge carrier mobility.** The hole and electron mobility were measured by using space-charge-limited (SCLC) method. Hole mobility was measured with the device structure of ITO/PEDOT:PSS/active layer/MoO<sub>3</sub>/Ag. Electron mobility was measured with the device structure of ITO/ZnO/active layer/PNDIT-F3N/Ag. The hole and electron mobility estimated by the following equation:  $J=9\epsilon_0\epsilon_r\mu V^2/8d^3$ , where  $J$  is the current density,  $\epsilon_0$  is the vacuum permittivity,  $\epsilon_r$  is the relative dielectric constant,  $V$  is the internal voltage in the device, and  $d$  is the thickness of the active layer.

**GIWAXS and GISAXS Measurement.** GIWAXS data were obtained at beamline BL02U2 of Shanghai Synchrotron Radiation Facility (SSRF). The monochromatic of the light source was 1.24 Å. The data were recorded by using the two-dimensional

image plate detector of Pilatus 2M from Dectris, Switzerland.

The incidence angle was 0.2°, and the sample-to-detector distance was 2200 mm by calibration for GISAXS.

The GISAXS 1D profiles were fitted with a universal model following Equation (1). Data fitting was done using Sas View (version 5.01) software.

$$I(q) = \frac{A_1}{[1 + (q\xi)^2]^2} + A_2 \langle P(q,R) \rangle S(q, R, \eta, D) + B \quad (1)$$

$$S(q) = 1 + \frac{\sin^{-1}[(D-1)\tan^{-1}(q\eta)]b \pm \sqrt{b^2 - 4ac}}{(qR)^D} \frac{D\Gamma(D-1)}{[1 + \frac{1}{(q\eta)^2}]^{(D-1)/2}} \quad (2)$$

where  $A_1$ ,  $A_2$ , and  $B$  are independent fitting parameters and  $q$  is the scattering wave vector. The average correlation length  $\xi$  of the PM6 domain and the Debye-Andersone-Brumberger (DAB) term make up the first term. The contribution from L8-BO fractal-like aggregations is seen by the second term. Here,  $R$  is the mean spherical radius of the primary L8-BO particles,  $P(q, R)$  is the form factor of the L8-BO,  $S(q, R, \eta, D)$  is the fractal structure factor to explain the primary particles interaction in this fractal-like aggregation system,  $\eta$  is the correlation length of the fractal-like structure, and  $D$  is the fractal dimension of the network. Equation 3 was used to calculate the average domain size by the Guinier radius of the fractal like network  $R_g$ .  $2R_g$  (the product of  $\eta$  and  $D$ ) is regarded as the domain size of acceptor aggregation.

$$R_g = \eta \sqrt{\frac{D(D+1)}{2}} \quad (3)$$

**Miscibility measurement:** Contact angle measurements were carried out by an Kruss DSA100, using water and glycerin by sessile drop analysis. The surface tension values of films are calculated by<sup>6</sup>:

$$\gamma_{wat}(\cos\theta_{wat} + 1) = 2\sqrt{\gamma_{wat}^d \gamma^d} + 2\sqrt{\gamma_{wat}^p \gamma^p}$$

$$\gamma_{MI}(\cos\theta_{Gly} + 1) = 2\sqrt{\gamma_{Gly}^d \gamma^d} + 2\sqrt{\gamma_{Gly}^p \gamma^p}$$

$$\gamma = \gamma^d + \gamma^p$$

where  $\theta$  is the contact angle of each thin film, and  $\gamma$  is the surface tension of samples, which is equal to the sum of the dispersion ( $\gamma^d$ ) and polarity ( $\gamma^p$ ) components;  $\gamma_{wat}$  and  $\gamma_{Gly}$  are the surface tensions of the water and glycerin; and  $\gamma_{wat}^d$ ,  $\gamma_{wat}^p$ ,  $\gamma_{Gly}^d$  and  $\gamma_{Gly}^p$  are the dispersion and polarity components of  $\gamma_{wat}$  and  $\gamma_{Gly}$ . The Flory-Huggins interaction parameters are deduced from:  $\chi_{D-A} = k(\sqrt{\gamma_D} - \sqrt{\gamma_A})^2$ , where  $k$  is a positive constant at a specific temperature<sup>7</sup>.

### 3. Device Fabrication and Characterization

The OSCs were fabricated with a conventional structure of ITO/2PACz/Active layer/PNDIT-F3N/Ag. In detail, ITO coated glass substrates were cleaned in turn with detergent water, deionized water, acetone and isopropyl alcohol in an ultrasonic bath sequentially for 15 mins and dried by nitrogen purge. Before use, the surface of ITO-coated glass was treated in an ultraviolet-ozone chamber for 20 min. Then a thin layer of [2-(9H-Carbazol-9-yl)ethyl]phosphonic acid (2PACz) (dissolved in ethanol at the concentration of 0.3 mg mL<sup>-1</sup>) was first spin-coated on the ITO substrates with 3000 rpm for 20 s. Subsequently, the 2PCAz films were baked at 100°C for 10 mins under ambient conditions and transferred to a glovebox filled with nitrogen. The PM6:L8-BO (1:1.2, w/w) were dissolved in chloroform at the donor concentration of 7 mg/mL with 50 wt% and 20 wt% 2T-Si and TT-Si, respectively. And the ternary device based on PM6:L8-BO:BTP-eC9 (1:0.8:0.4) was dissolved in chloroform at the donor concentration of 7 mg/mL with 50 wt% 2T-Si. All the solutions need to be stirred at room temperature for 4 hours, and were spin-casted at 2000 rpm for 30 s onto the 2PACz layer. After spin-coating, the blend films were annealed at 90°C for 5 mins. After cooled down, the methanol solution of PNDIT-F3N (1 mg/mL) was spin-coated on the top of the active layer at 3000 rpm for 20 s. Finally, Ag electrode with the thickness of 150 nm was evaporated under  $2 \times 10^{-6}$  Pa. The active area of the device was 4 mm<sup>2</sup>, and a shadow mask with an area was about 3.24 mm<sup>2</sup> in our laboratory. The glue dispenser/spin coater (Brand-REESEEN, PvS-mini7) used in the lab are from Jiangyin J. Wanjia Technology Co., Ltd.

The current density-voltage ( $J-V$ ) curves of OSCs were recorded on a Keithley 2400 source-measure unit in a glove box filled with nitrogen. Enli SS-F5-3A solar

simulator with AM1.5 G was used as the light source, and the light intensity was 100 mW cm<sup>-2</sup> which was calibrated by a standard Si solar cell (made by Enli Technology Co., Ltd., Taiwan, and calibrated report can be traced to NREL). A QE-R Solar Cell Spectral Response Measurement System was used to measure the external quantum efficiency (EQE) values of the devices. A Veeco Dektak 150 profilometer was used to measure the thickness of the active layers.

#### 4. Synthesis

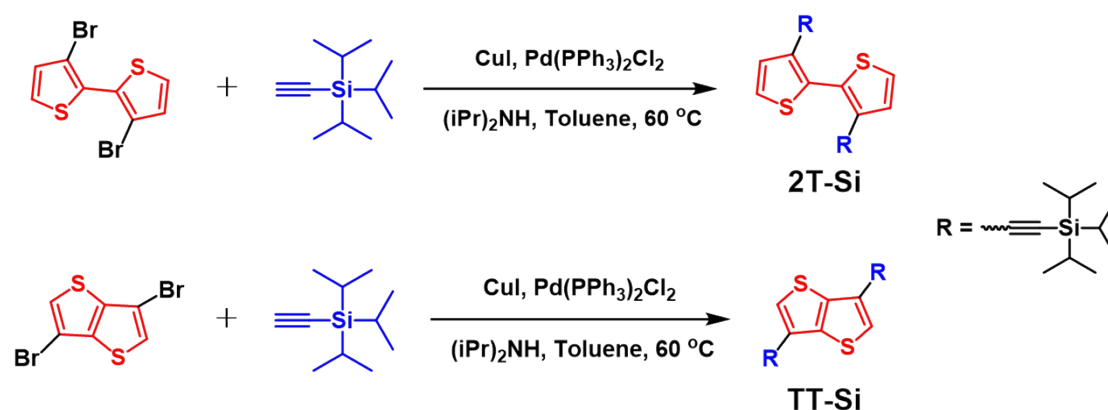

**Scheme S1. Synthetic route of the solid additives 2T-Si and TT-Si.**

**3,3'-Bis(triisopropylsilylethynyl)-2,2'-dithiophene (2T-Si):** 3,3'-Dibromo-2,2'-bithiophene (500 mg, 1.543 mmol) was dissolved in THF (25 mL) and diisopropylamine (25 mL) in a two-neck round-bottom flask that is adapted with a reflux condenser. Under N<sub>2</sub> atmosphere, CuI (29 mg, 0.154 mmol), (PPh<sub>3</sub>)<sub>2</sub>PdCl<sub>2</sub> (54 mg, 0.0771 mmol), and triisopropylsilylacetylene (704 mg, 3.857 mmol) were then added. The mixture was stirred at 60 °C for 6 hours. Then the reaction mixture was cooled to room temperature, and poured into water (150 mL) and extracted with dichloromethane (100 mL × 3). The combined organic extracts were dried over anhydrous MgSO<sub>4</sub>. After concentrate the organic layer by vacuum evaporation, the raw product was purified with chromatography column by using petroleum ether as the eluent. 2T-Si was obtained as a white solid (675 mg, 1.281 mmol, 83%). <sup>1</sup>H NMR (500MHz, CDCl<sub>3</sub>) δ: 7.16 (d, *J* = 5.25 Hz, 2H), 7.07 (d, *J* = 5.25 Hz, 2H), 1.14-1.11 (m, 42H). <sup>13</sup>C NMR (126 MHz, CDCl<sub>3</sub>): δ 138.83, 127.52, 90.19, 81.60, 18.71, 18.57, 11.42, 11.32.

**3,6-Bis(triisopropylsilylethynyl)thieno[3,2-*b*]thiophene (TT-Si):** TT-Si (698 mg,

1.393 mol, 81%) was obtained as a white solid from 3,6-dibromothiopheno[3,2-*b*]thiophene (500 mg, 1.678 mmol), triisopropylacetylene (765 mg, 4.195 mmol), (PPh<sub>3</sub>)<sub>2</sub>PdCl<sub>2</sub> (59 mg, 0.0839 mmol) and CuI (32 mg, 0.168 mmol), using anhydrous diisopropylamine/THF (25 mL/25 mL) as the solvent, following the procedure for the synthesis of 2T-Si. <sup>1</sup>H NMR (500MHz, CDCl<sub>3</sub>) δ: 7.33 (s, 2H), 1.25 (s, 6H), 1.14-1.09 (m, 36H). <sup>13</sup>C NMR (126 MHz, CDCl<sub>3</sub>): δ 139.81, 125.14, 103.02, 90.20, 81.60, 18.58, 11.32.

## 5. Supporting Figures and Tables

### NMR Spectra

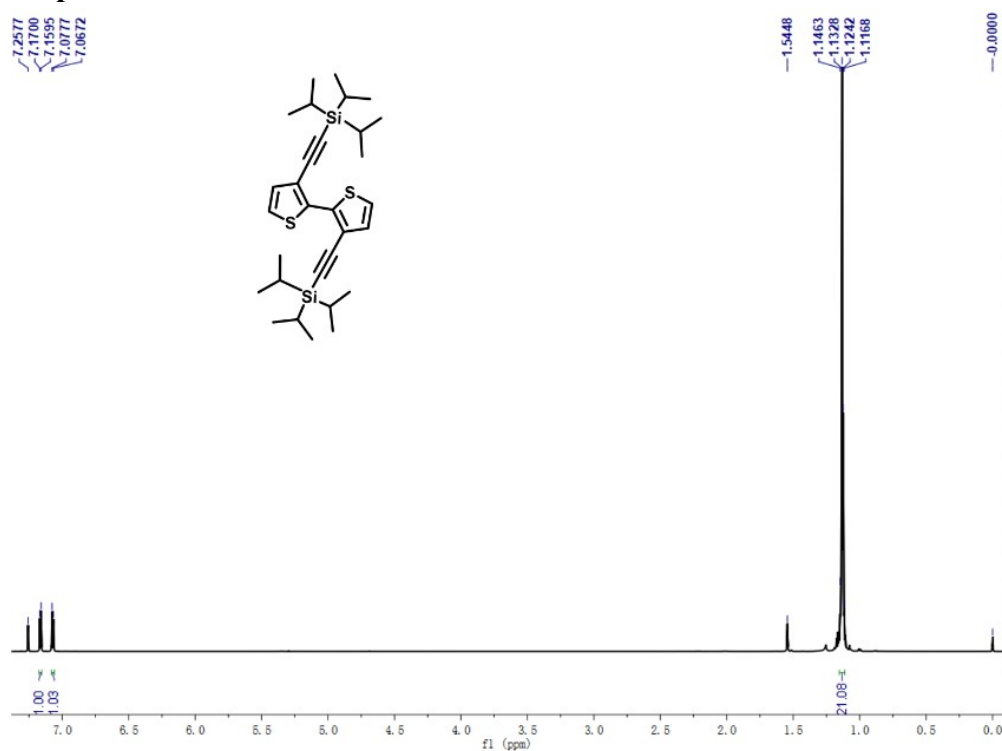

**Fig. S1** <sup>1</sup>H NMR spectrum of **2T-Si** at 293K in CDCl<sub>3</sub>.

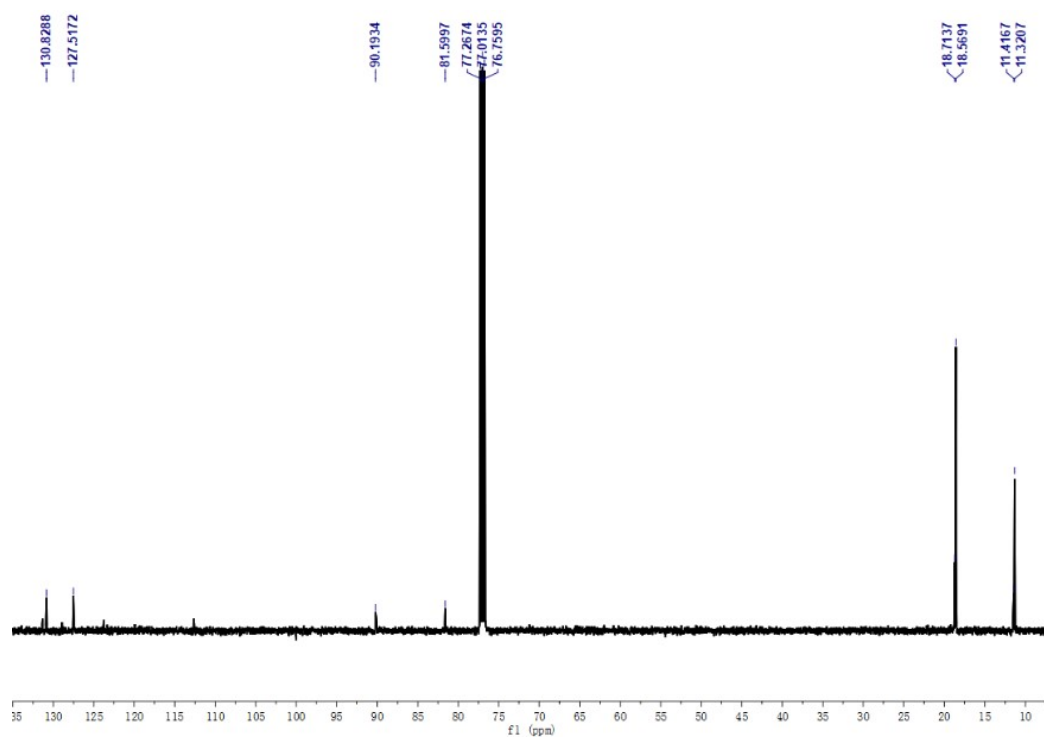

**Fig. S2** <sup>13</sup>C NMR spectrum of 2T-Si at 293K in CDCl<sub>3</sub>.

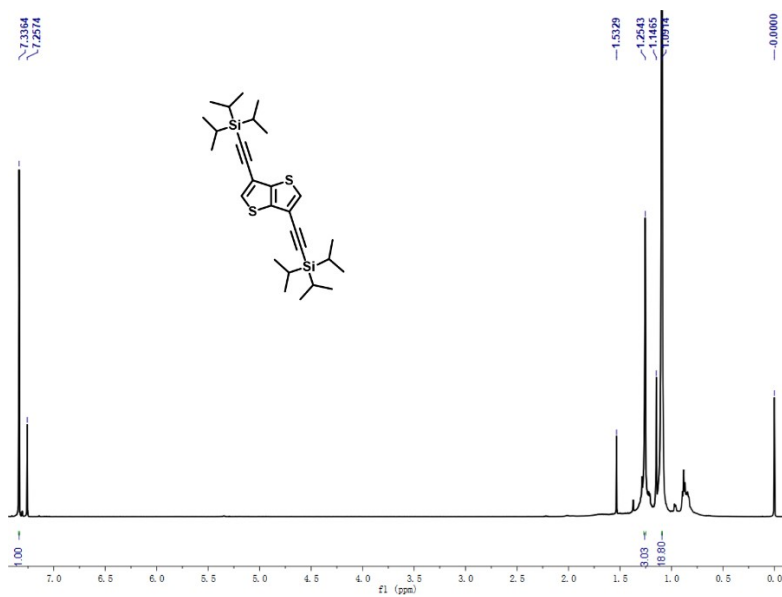

**Fig. S3** <sup>1</sup>H NMR spectrum of TT-Si at 293K in CDCl<sub>3</sub>.



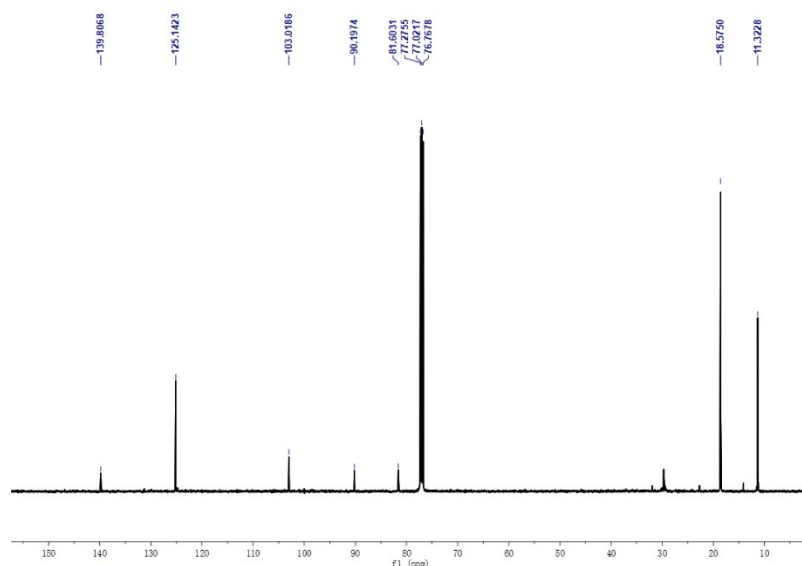

**Fig. S4**  $^{13}\text{C}$  NMR spectrum of TT-Si at 293K in  $\text{CDCl}_3$ .

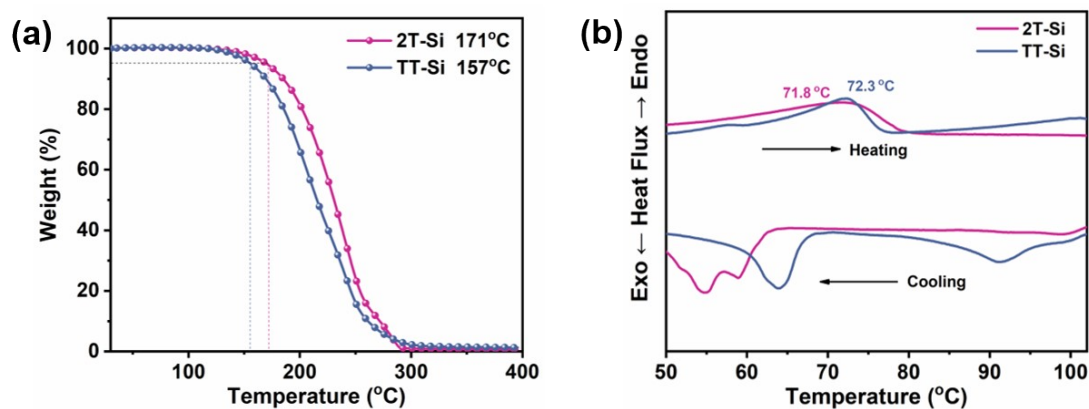

**Fig. S5** (a) TGA curves and (b) DSC plots of 2T-Si and TT-Si.

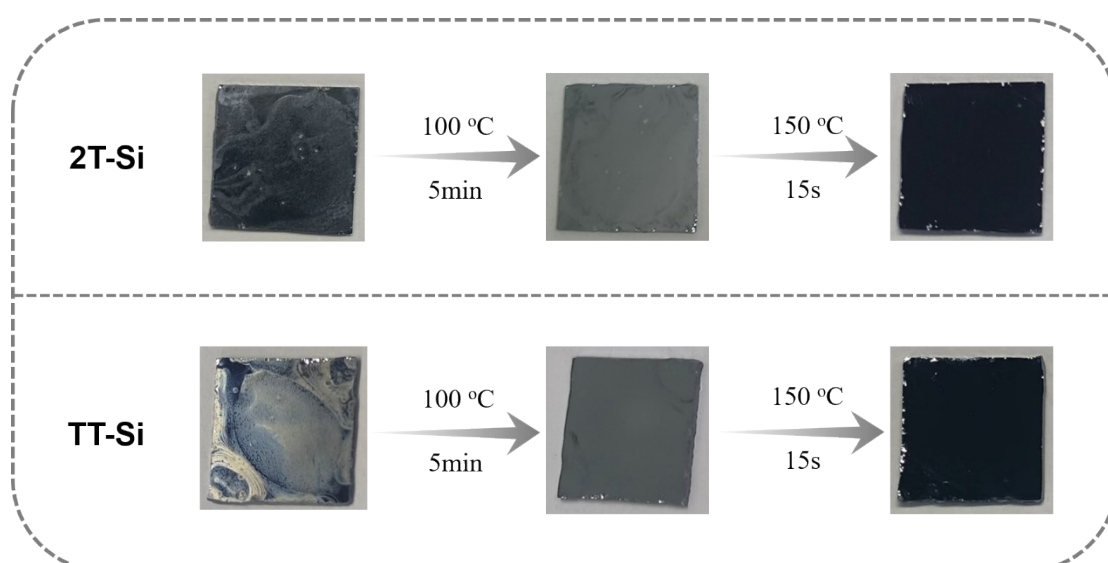

**Fig. S6** Evolution of the pure additives film deposited on the silicon substrate in ambient.

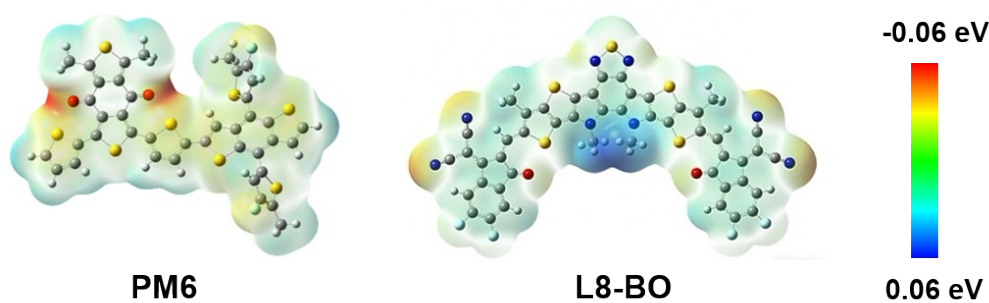

**Fig. S7** Calculated ESP distribution of PM6 and L8-BO.

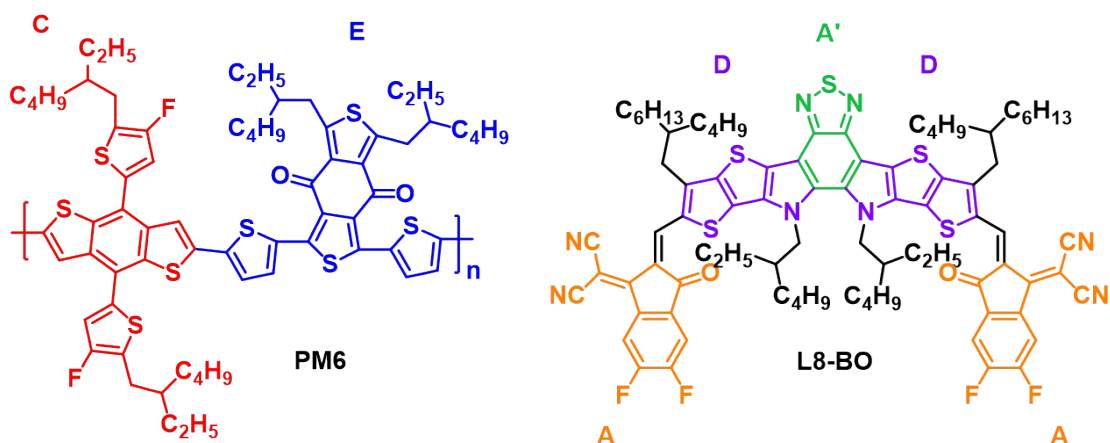

**Fig. S8** Among PM6, the repeating unit of BDT-F in PM6 defined as C and the repeating unit of BDD in PM6 defined as E. Among chemical structures of L8-BO, the acceptor-strong electron end group in NFA defined as A, the donor-strong electron group in NFA defined as D and the central acceptor unit was defined as A'.

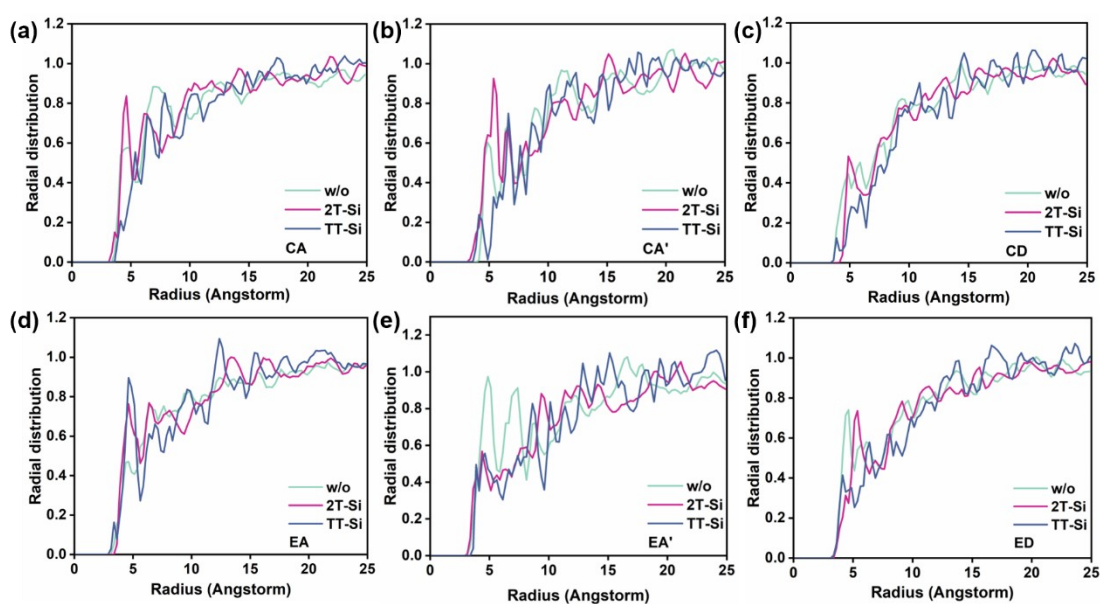

**Fig. S9** Radial distribution function  $g(r)$  for the molecular fragments of PM6 and L8-

BO defined in Fig. S3 extracted from simulated blends.

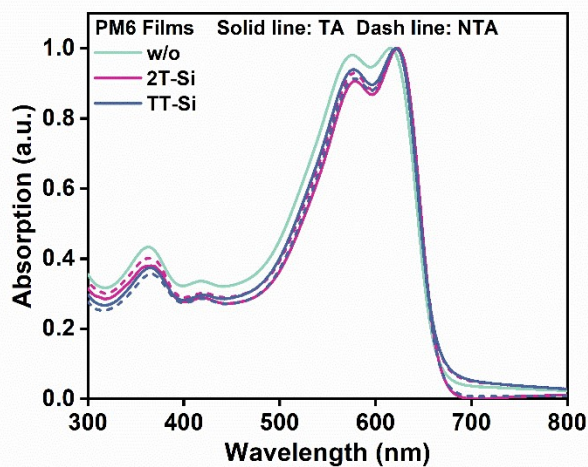

**Fig. S10** Normalized absorption spectra of PM6 films with or without thermal annealing treatment.

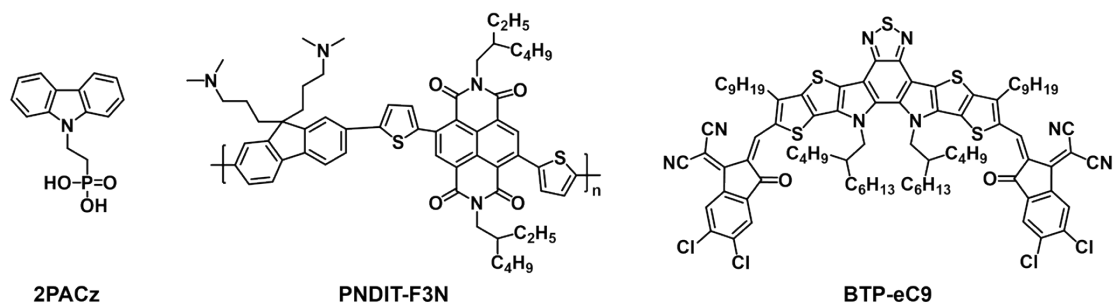

**Fig. S11** Chemical structures of 2PACz, PNDIT-F3N and BTP-eC9.

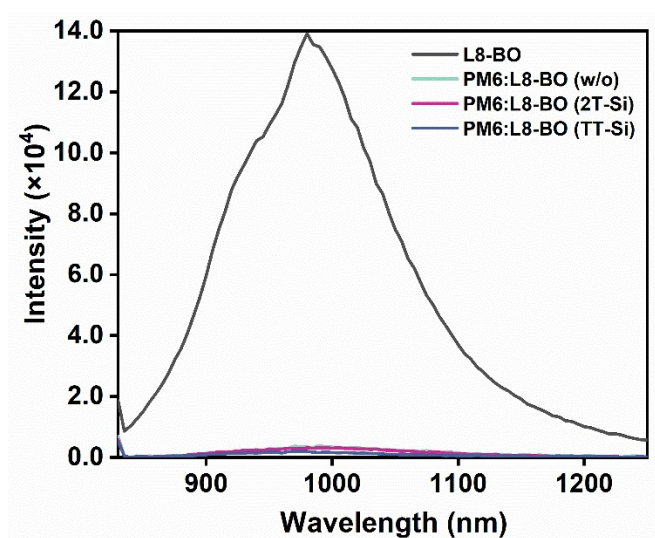

**Fig. S12** PL spectra of the neat L8-BO film and the PM6:L8-BO film processed with

and without additives with the excitation wavelength at 800 nm

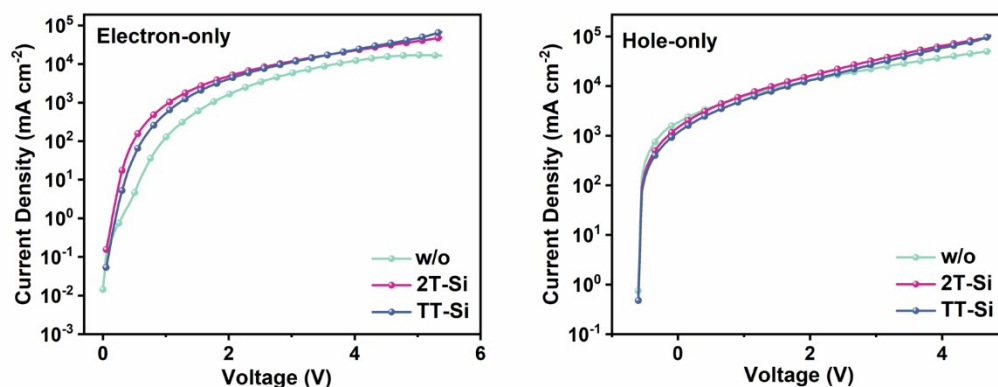

**Fig. S13** The electron and hole mobility curves of additive-free and 2T-Si/TT-Si-treated PM6:L8-BO blend films.

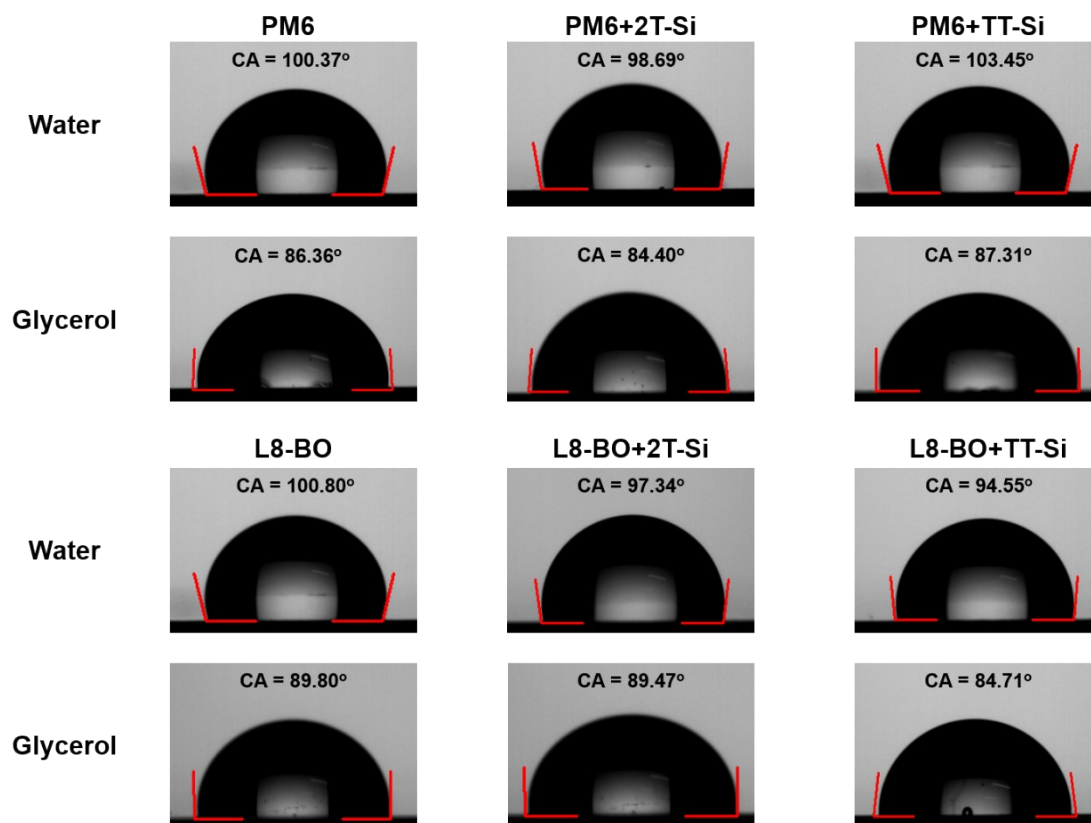

**Fig. S14** Contact angle images of water and glycerol droplets on the surfaces of PM 6 and L8-BO films treated without/with different additives.

**Table S1** Energy analysis of the interactions between solid additives and active materials.

| Treatment | Interaction   | PM6<br>(KJ/mol) | L8-BO<br>(KJ/mol) |
|-----------|---------------|-----------------|-------------------|
| 2T-Si     | Electrostatic | -291.742        | -458.013          |
|           | Van der Waals | -28688.6        | -37772.9          |
|           | total         | -28980.342      | -38230.913        |
| TT-Si     | Electrostatic | -134.347        | -285.489          |
|           | Van der Waals | -15945.8        | -21117.3          |
|           | total         | -16080.157      | -21402.789        |

**Table S2** Device parameters of PM6:L8-BO-based OSCs with different contents of 2T-Si.

| Conditions | $V_{oc}$<br>(V) | $J_{sc}$<br>(mA cm <sup>-2</sup> ) | $J_{sc}^{cal}$<br>(mA cm <sup>-2</sup> ) | FF<br>(%) | PCE<br>(%) |
|------------|-----------------|------------------------------------|------------------------------------------|-----------|------------|
| 0          | 0.893           | 26.21                              | 25.37                                    | 77.0      | 18.02      |
| 5%         | 0.900           | 26.03                              | 24.70                                    | 79.3      | 18.57      |
| 10%        | 0.903           | 25.83                              | 24.78                                    | 81.0      | 18.93      |
| 15%        | 0.890           | 26.62                              | 25.51                                    | 79.5      | 18.83      |
| 30%        | 0.895           | 26.24                              | 25.46                                    | 80.6      | 18.94      |
| 50%        | 0.882           | 27.28                              | 26.55                                    | 80.04     | 19.26      |
| 70%        | 0.880           | 25.96                              | 25.24                                    | 80.5      | 18.42      |

**Table S3** Device parameters of PM6:L8-BO-based OSCs with different contents of TT-Si.

| Conditions | $V_{oc}$<br>(V) | $J_{sc}$<br>(mA cm <sup>-2</sup> ) | $J_{sc}^{cal}$<br>(mA cm <sup>-2</sup> ) | FF<br>(%) | PCE<br>(%) |
|------------|-----------------|------------------------------------|------------------------------------------|-----------|------------|
| 0          | 0.893           | 26.21                              | 25.37                                    | 77.0      | 18.02      |
| 10%        | 0.896           | 25.82                              | 24.83                                    | 81.1      | 18.80      |
| 20%        | 0.881           | 27.23                              | 26.04                                    | 79.1      | 19.00      |
| 30%        | 0.881           | 25.81                              | 25.29                                    | 80.5      | 18.32      |
| 50%        | 0.882           | 26.31                              | 25.45                                    | 80.4      | 18.67      |
| 70%        | 0.881           | 26.28                              | 25.60                                    | 80.3      | 18.60      |

**Table S4** Photovoltaic parameters of devices based on PM6:L8-BO with the recently reported solid additives and the halogenated analogues mentioned in the introduction.

| Treatment | $V_{oc}$ (V) | $J_{sc}$ (mA cm <sup>-2</sup> ) | FF (%) | PCE (%) | Ref.                                                           |
|-----------|--------------|---------------------------------|--------|---------|----------------------------------------------------------------|
| FL        | 0.885        | 26.64                           | 76.80  | 18.10   |                                                                |
| DBT       | 0.877        | 26.52                           | 75.84  | 17.63   | <i>Small</i> , 2024, <b>20</b> , 2405573.                      |
| DBF       | 0.893        | 27.01                           | 77.36  | 18.62   |                                                                |
| TZ-Cl     | 0.899        | 26.71                           | 76.31  | 18.30   |                                                                |
| TZ-2Cl    | 0.901        | 27.01                           | 75.93  | 18.50   | <i>Energ. Environ. Sci.</i> , 2025, <b>18</b> , 2298-2307.     |
| TZ-3Cl    | 0.903        | 27.29                           | 80.19  | 19.80   |                                                                |
| DTP       | 0.870        | 26.42                           | 77.99  | 17.92   |                                                                |
| DTH       | 0.861        | 27.07                           | 79.40  | 18.51   | <i>Adv. Funct. Mater.</i> , 2024, <b>34</b> , 2401823.         |
| DTN       | 0.848        | 27.24                           | 78.73  | 18.18   |                                                                |
| SA-T5     | 0.879        | 26.65                           | 80.30  | 18.80   | <i>Nano Energy</i> , 2024, <b>125</b> , 109604.                |
| 2,2-TT    | 0.895        | 26.49                           | 79.32  | 18.80   |                                                                |
| 2,3-TT    | 0.913        | 26.54                           | 79.33  | 19.22   | <i>Angew. Chem. Int. Edit.</i> , 2025, <b>64</b> , e202514004  |
| 3,3-TT    | 0.916        | 26.52                           | 79.61  | 19.34   |                                                                |
| 3,6TTBr   | 0.890        | 26.80                           | 80.40  | 19.10   | <i>Adv. Mater.</i> , 2025, <b>37</b> , 2418393.                |
| D1-H      | 0.867        | 26.71                           | 76.10  | 17.62   |                                                                |
| D1-F      | 0.873        | 26.76                           | 75.90  | 17.73   | <i>Adv. Funct. Mater.</i> , 2024, <b>35</b> , 2415090          |
| D1-Cl     | 0.886        | 26.62                           | 78.80  | 18.59   |                                                                |
| TCBB-1    | 0.892        | 27.03                           | 78.50  | 18.93   | <i>J. Mater. Chem. A</i> , 2025, <b>13</b> , 35329-35341.      |
| TCBB-2    | 0.882        | 26.20                           | 77.95  | 18.01   |                                                                |
| DBB       | 0.894        | 25.90                           | 78.5   | 18.20   | <i>Angew. Chem. Int. Edit.</i> , 2025, <b>64</b> , e202500085. |
| DFBB      | 0.898        | 26.40                           | 80.8   | 19.20   |                                                                |
| DBrTz     | 0.886        | 26.80                           | 80.00  | 19.00   | <i>Adv. Energy Mater.</i> , 2024, 2404507.                     |
| BrITz     | 0.886        | 26.30                           | 78.30  | 18.20   |                                                                |
| T3T       | 0.907        | 26.25                           | 76.61  | 18.25   | <i>Chem. Eng. J.</i> , 2025, <b>524</b> , 168963.              |
| 1-MN      | 0.883        | 26.82                           | 77.22  | 18.29   |                                                                |
| 2-MN      | 0.890        | 26.61                           | 78.91  | 18.70   | <i>J. Mater. Chem. A</i> , 2025, <b>13</b> , 4600-4613.        |
| 2,7-MN    | 0.882        | 26.09                           | 76.20  | 17.55   |                                                                |
| 2T-Si     | 0.882        | 27.28                           | 80.04  | 19.26   | This work                                                      |
| TT-Si     | 0.881        | 27.23                           | 79.12  | 19.00   | This work                                                      |

**Table S5** Photovoltaic performance parameters for the PM6:Y6, PM6:BO-4Cl and PM6:BTP-eC9 systems with and without 2T-Si as additive.

| Active layers | Treatment | $V_{oc}$ (V) | $J_{sc}$ (mA cm <sup>-2</sup> ) | FF (%) | PCE (%) |
|---------------|-----------|--------------|---------------------------------|--------|---------|
| PM6:Y6        | w/o       | 0.849        | 26.27                           | 76.81  | 17.13   |
|               | 2T-Si     | 0.825        | 26.92                           | 78.99  | 17.54   |
| PM6:BO-4Cl    | w/o       | 0.872        | 26.75                           | 78.05  | 18.20   |
|               | 2T-Si     | 0.849        | 28.04                           | 77.95  | 18.56   |
| PM6:BTP-eC9   | w/o       | 0.865        | 26.50                           | 74.64  | 17.12   |
|               | 2T-Si     | 0.852        | 27.98                           | 80.65  | 19.22   |

The device parameters were obtained from over 10 devices.

**Table S6** Summary of the GIWAXS parameters for the additive-free or 2T-Si/TT-Si-treated PM6, L8-BO, and PM6:L8-BO films.

| Conditions  | In-Plane<br>Lamellar stacking |                  |                            |            | Out-of-Plane<br>$\pi$ - $\pi$ stacking |                  |                            |            |
|-------------|-------------------------------|------------------|----------------------------|------------|----------------------------------------|------------------|----------------------------|------------|
|             | q<br>(Å <sup>-1</sup> )       | d-spacing<br>(Å) | FWHM<br>(Å <sup>-1</sup> ) | CCL<br>(Å) | q<br>(Å <sup>-1</sup> )                | d-spacing<br>(Å) | FWHM<br>(Å <sup>-1</sup> ) | CCL<br>(Å) |
| PM6 (w/o)   | 0.27                          | 22.11            | 0.11                       | 56.52      | 1.56                                   | 4.02             | 1.23                       | 4.59       |
| PM6+2T-Si   | 0.29                          | 21.88            | 0.08                       | 70.69      | 1.58                                   | 3.97             | 0.51                       | 11.08      |
| PM6+TT-Si   | 0.28                          | 22.03            | 0.09                       | 62.37      | 1.58                                   | 3.97             | 0.66                       | 8.56       |
| L8-BO (w/o) |                               |                  |                            |            | 1.70                                   | 3.69             | 0.76                       | 10.87      |
| L8-BO+2T-Si |                               |                  |                            |            | 1.72                                   | 3.64             | 0.17                       | 33.24      |
| L8-BO+TT-Si |                               |                  |                            |            | 1.71                                   | 3.67             | 0.40                       | 14.02      |
| Blend (w/o) | 0.29                          | 21.65            | 0.16                       | 35.34      | 1.65                                   | 3.80             | 0.433                      | 13.05      |
| Blend+2T-Si | 0.30                          | 20.93            | 0.10                       | 56.55      | 1.69                                   | 3.73             | 0.334                      | 16.92      |
| Blend+TT-Si | 0.30                          | 20.93            | 0.12                       | 47.12      | 1.66                                   | 3.78             | 0.403                      | 14.02      |

**Table S7** Fitting parameters of pristine and additive-processed films, where  $\xi$ ,  $2R_g$ , and  $D$  are obtained from GISAXS fitting.

| Active Layer      | $\xi$ (nm) | $\eta$ (nm) | $D$ | $2R_g$ (nm) |
|-------------------|------------|-------------|-----|-------------|
| PM6:L8-BO (w/o)   | 21.8       | 6.3         | 2.2 | 23.6        |
| PM6:L8-BO (2T-Si) | 23.5       | 6.8         | 2.4 | 27.5        |
| PM6:L8-BO (TT-Si) | 22.3       | 6.5         | 2.4 | 26.3        |

**Table S8** Parameters of contact angles and surface energies of films.

| Treatment | Film  | Contact angle [°] |           | $\gamma$<br>(mN m <sup>-1</sup> ) | $\chi^{D-A}$<br>(K) |
|-----------|-------|-------------------|-----------|-----------------------------------|---------------------|
|           |       | Water             | Glycerine |                                   |                     |
| w/o       | PM6   | 100.37            | 86.36     | 24.31                             | 0.32                |
|           | L8-BO | 100.80            | 89.80     | 19.05                             |                     |
| 2T-Si     | PM6   | 98.69             | 84.40     | 25.68                             | 0.98                |
|           | L8-BO | 97.34             | 89.47     | 16.68                             |                     |
| TT-Si     | PM6   | 103.45            | 87.31     | 27.60                             | 0.54                |
|           | L8-BO | 94.55             | 84.71     | 20.39                             |                     |

## References

1. M. J. Abraham, T. Murtola, R. Schulz, S. Páll, J. C. Smith, B. Hess and E. Lindahl, *SoftwareX*, 2015, **1-2**, 19-25.
2. B. Hess, H. Bekker, H. J. C. Berendsen and J. G. E. M. Fraaije, *J. Comput. Chem.*, 1997, **18**, 1463-1472.
3. M. Parrinello and A. Rahman, *J. Appl. Phys.*, 1981, **52**, 7182-7190.
4. S. Nosé, *J. Chem. Phys.*, 1984, **81**, 511-519.
5. A. D. W. Humphrey, K. Schulten., *J. Mol. Graph.*, 1996, *14*.
6. S. Nilsson, A. Bernasik, A. Budkowski, E. Moons, *Macromolecules* 2007, **40**, 8291.
7. D. K. Owens, R. C. Wendt, *J. Appl. Polym. Sci.*, 1969, **13**, 1741.
